# Supplementary material for: Development and Psychometric Evaluation of a Revised Sense of Coherence Scale
Source: Atypon-hosted journal article supplement (doi:10.1027/1015-5759/a000323), 2016-04-22
Supplement: 1015-5759_a000323_esm1.pdf [file 1015-5759_a000323_esm1.pdf]

Electronic supplementary material

*SOC-R descriptive statistics of deleted items (core content) in sample 1*

|                            | Mean | SE  | SD   | Skewness | Kurtosis | Item-Scale |
|----------------------------|------|-----|------|----------|----------|------------|
| fate determines life       | 3.39 | .07 | 1.21 | -.57     | -.45     | .12        |
| leave “Why” unanswered     | 3.42 | .07 | 1.22 | -.50     | -.61     | .41        |
| being consternated         | 2.78 | .07 | 1.22 | .05      | -1.04    | .29        |
| accept sad things          | 4.00 | .05 | .94  | -.97     | .87      | .64        |
| experiences are explicable | 3.29 | .06 | 1.08 | -.28     | -.44     | .50        |
| disappointed by others     | 2.96 | .06 | 1.04 | -.17     | -.61     | .09        |
| meaning in actions         | 3.80 | .05 | .86  | -.71     | .81      | .46        |
| victory or survival        | 3.16 | .06 | 1.16 | -.16     | -.73     | .02        |
| difficult challenges       | 1.94 | .05 | .94  | .74      | -.09     | .28        |
| learn from experiences     | 3.79 | .05 | .85  | -.55     | .38      | .64        |
| elaborate experiences      | 3.67 | .05 | .98  | -.37     | -.38     | .44        |
| making mistakes            | 4.01 | .05 | .89  | -.78     | .50      | .45        |
| different experiences      | 3.07 | .06 | 1.02 | -.10     | -.46     | .48        |

*Note.*  $N = 334$ ; Item-Scale = corrected item-scale correlation; Scale range: 1-5.
